# Supplementary figures and images for: Does Differential Receptor Distribution Underlie Variable Responses to a Neuropeptide in the Lobster Cardiac System?
Source: MDPI journal article supplement (doi:10.3390/ijms22168703), 2021-08-13

A)

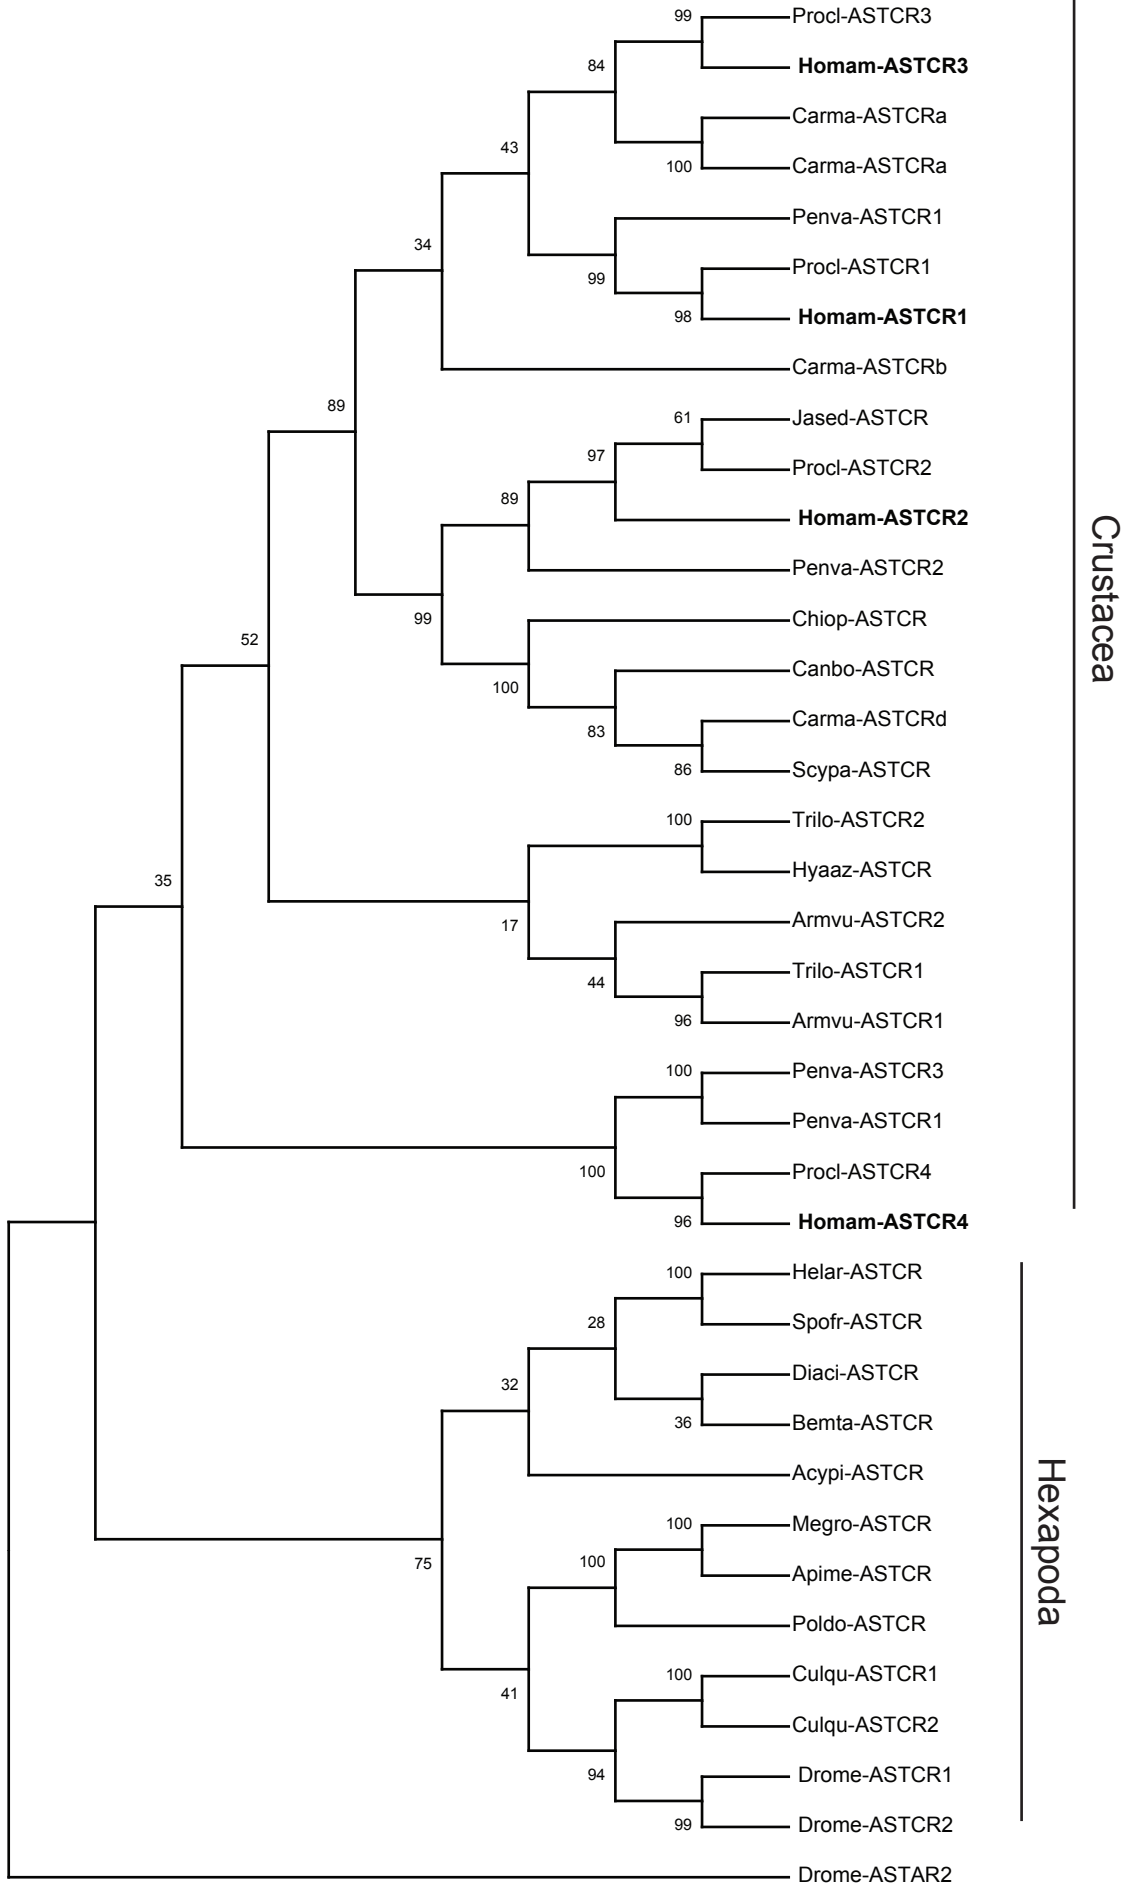

B)

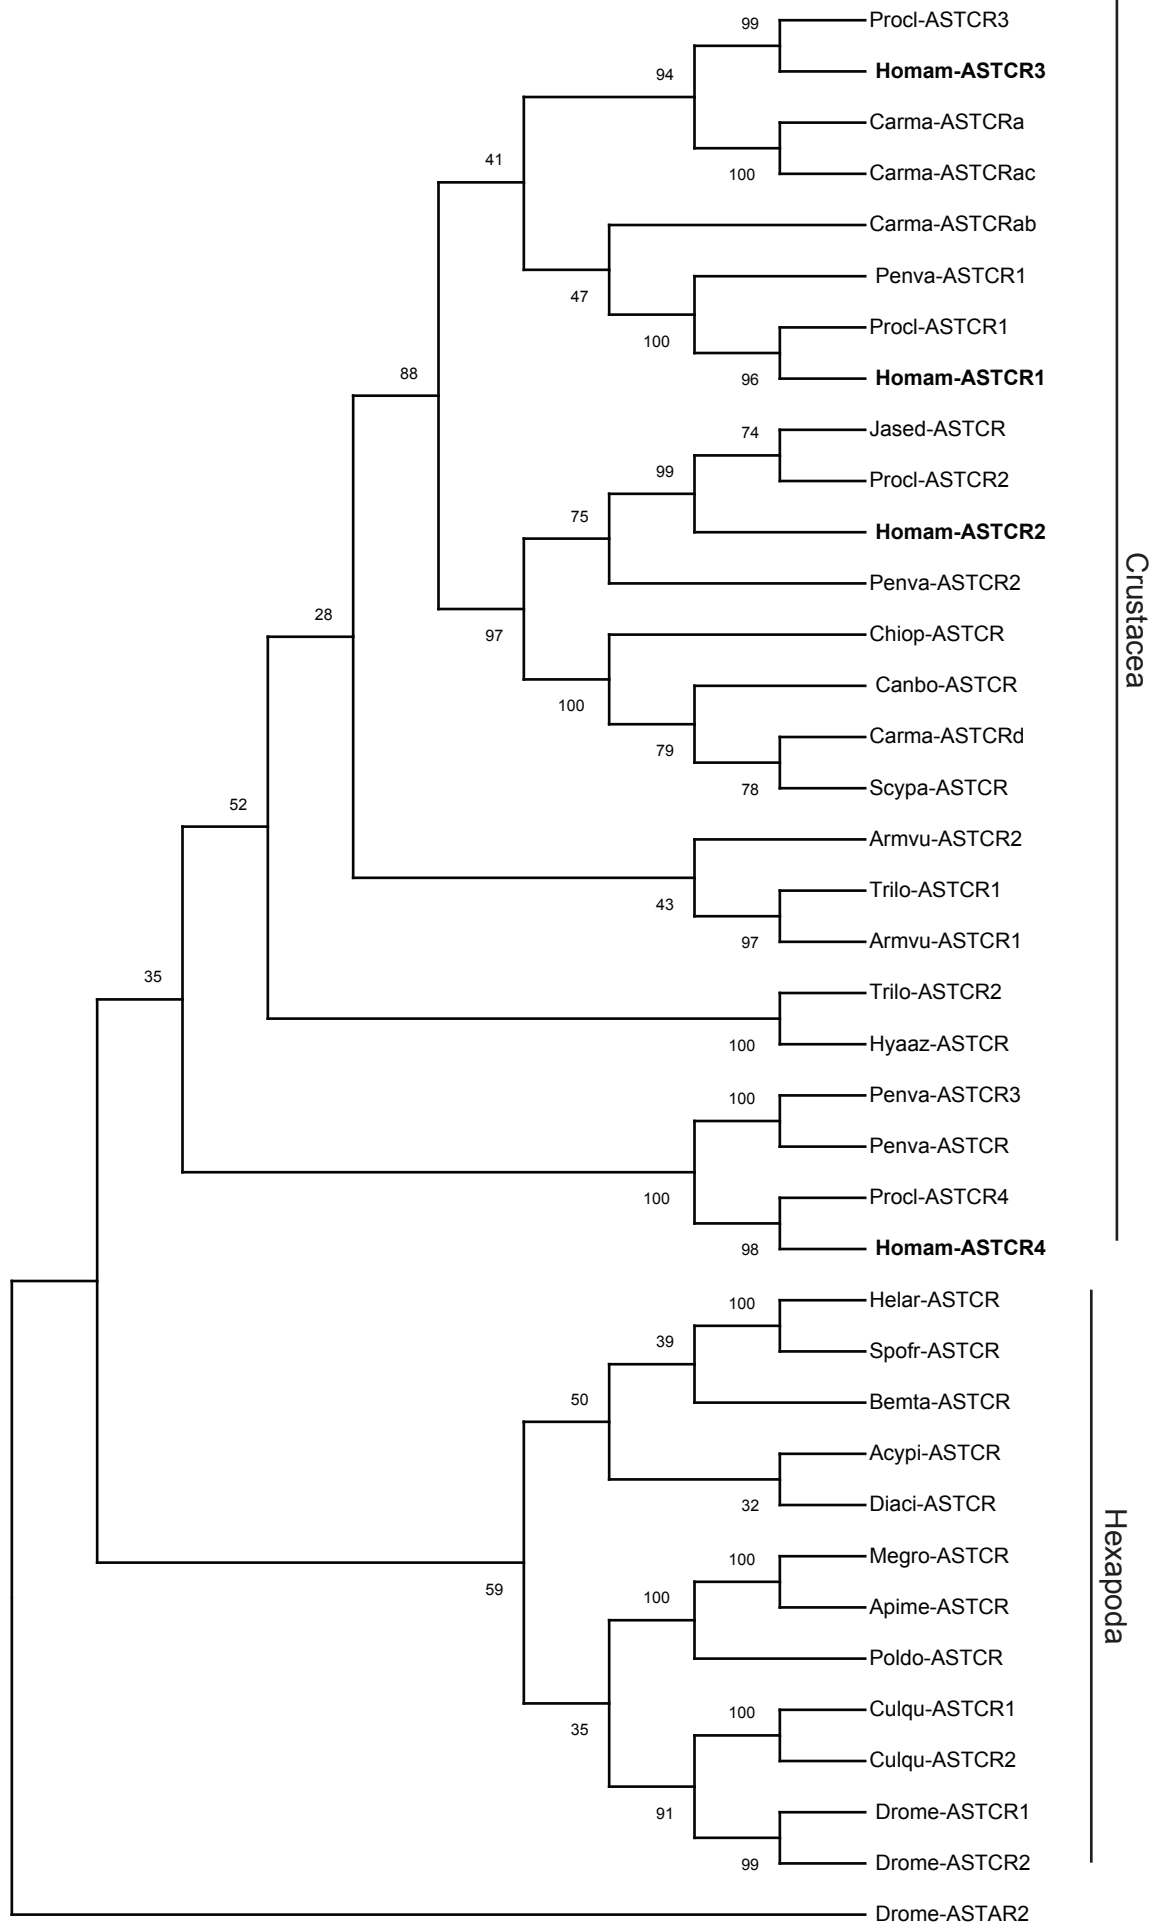

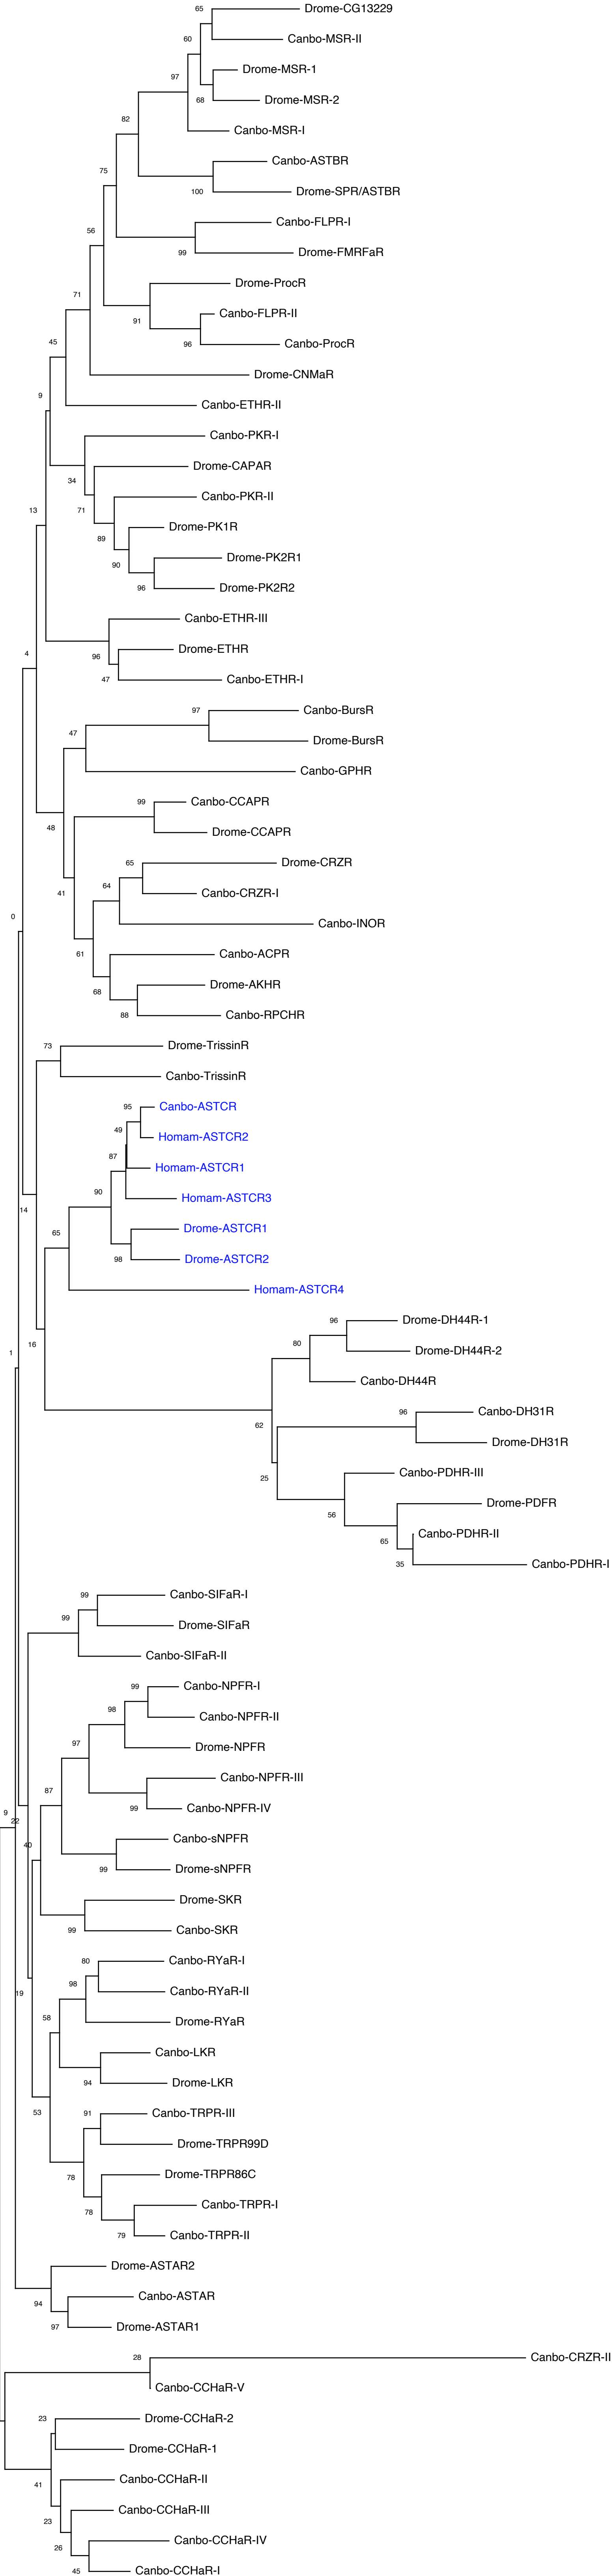

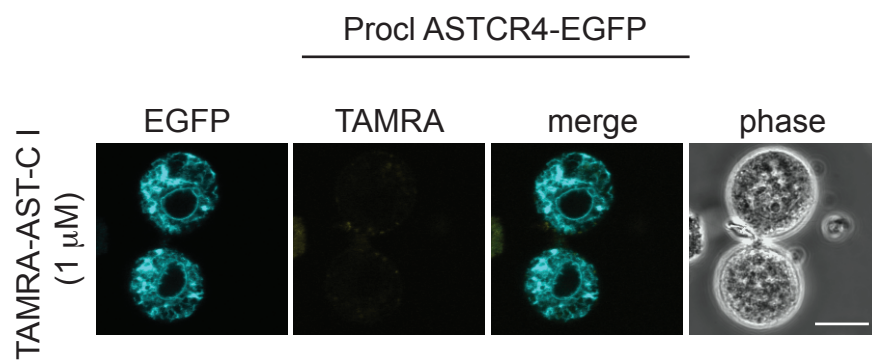

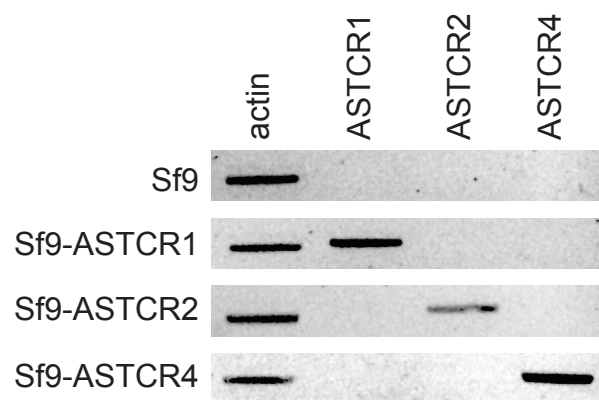

ASTCR1 : ASTCR4 Expression (tpm)

$R = -0.37$  ,  $p = 0.075$

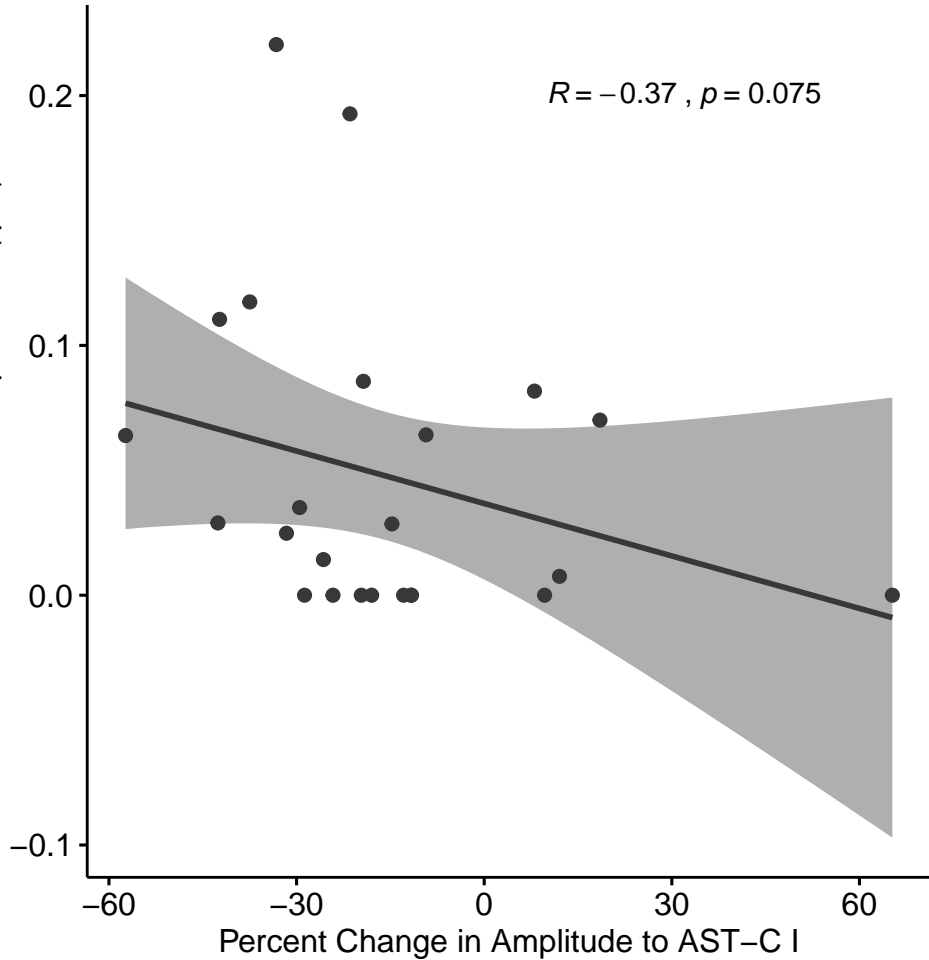

Supplement: s1 [file s1]
